# Supplementary material
Source: PubMed Central journal article supplement (PMC5895533)

Supporting Figure S1

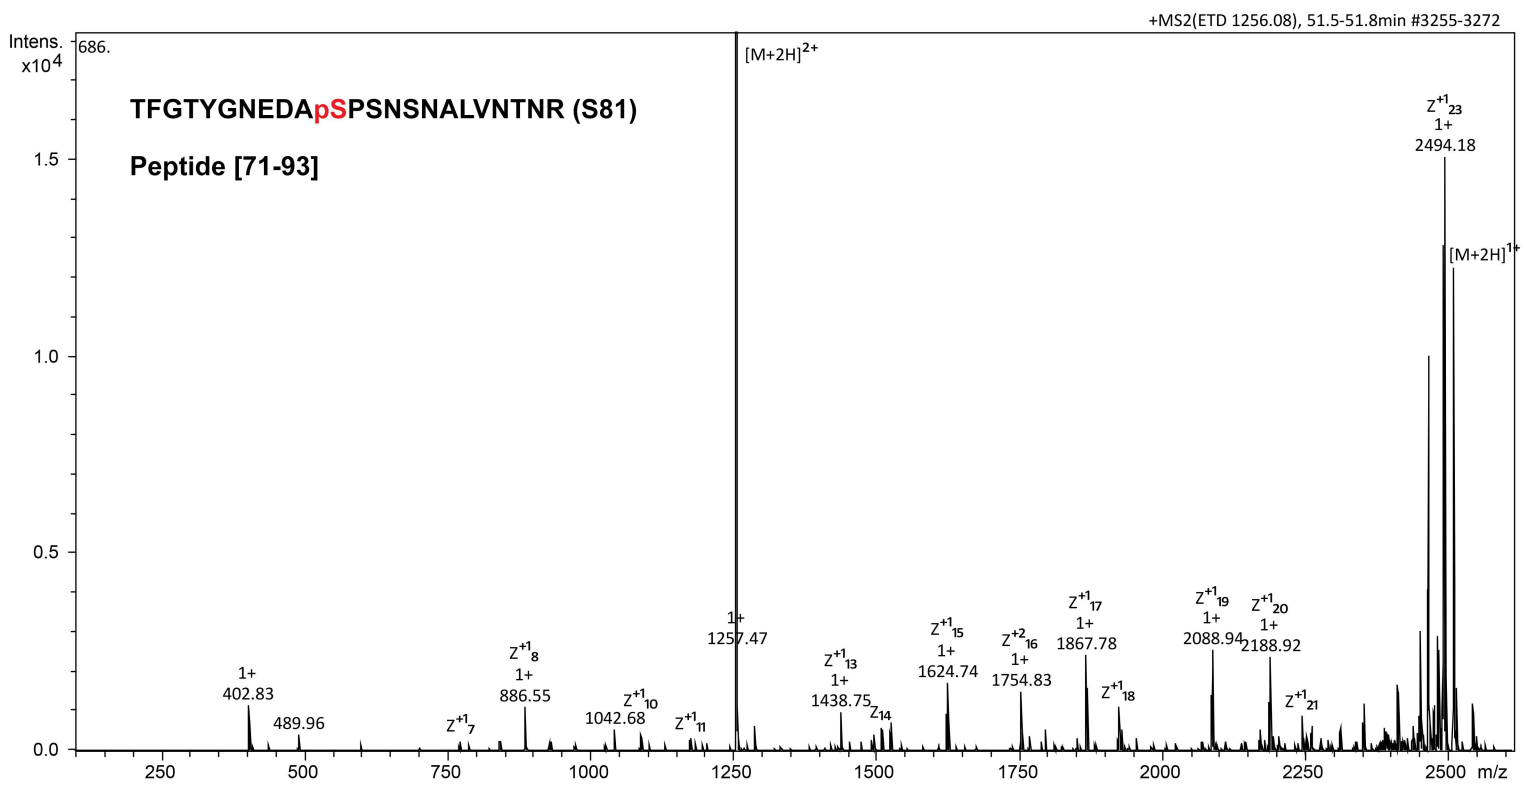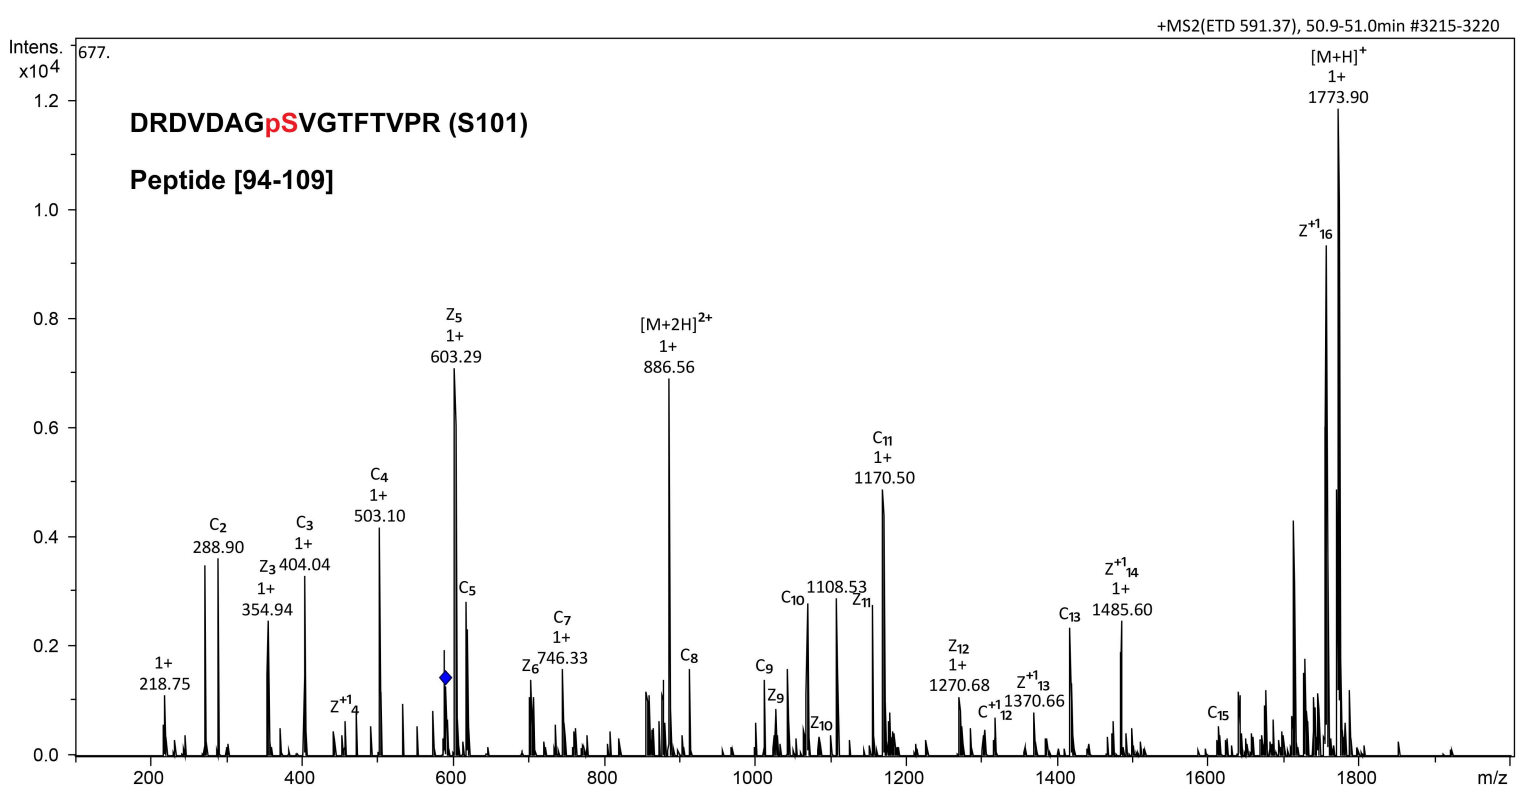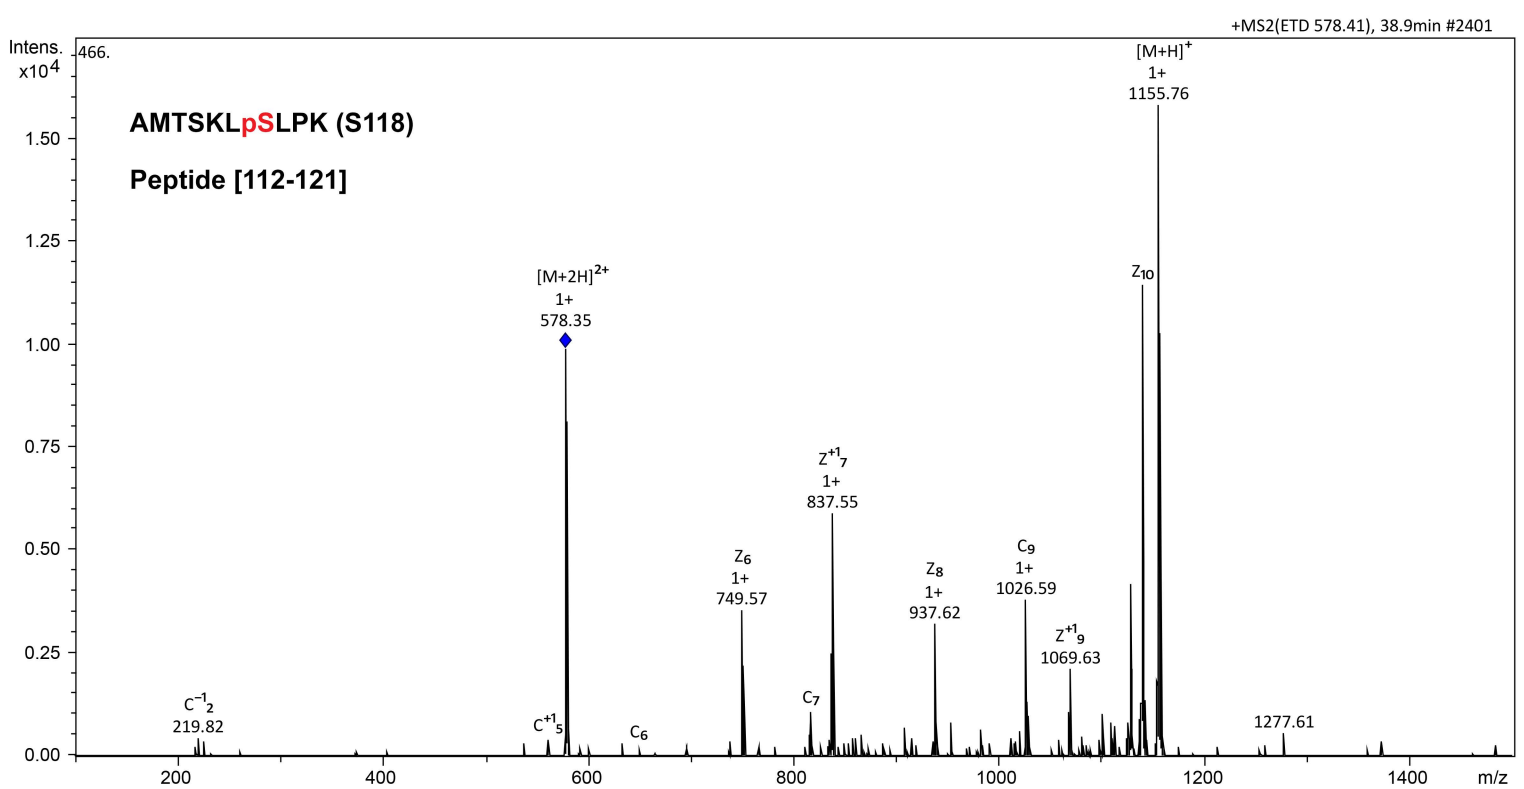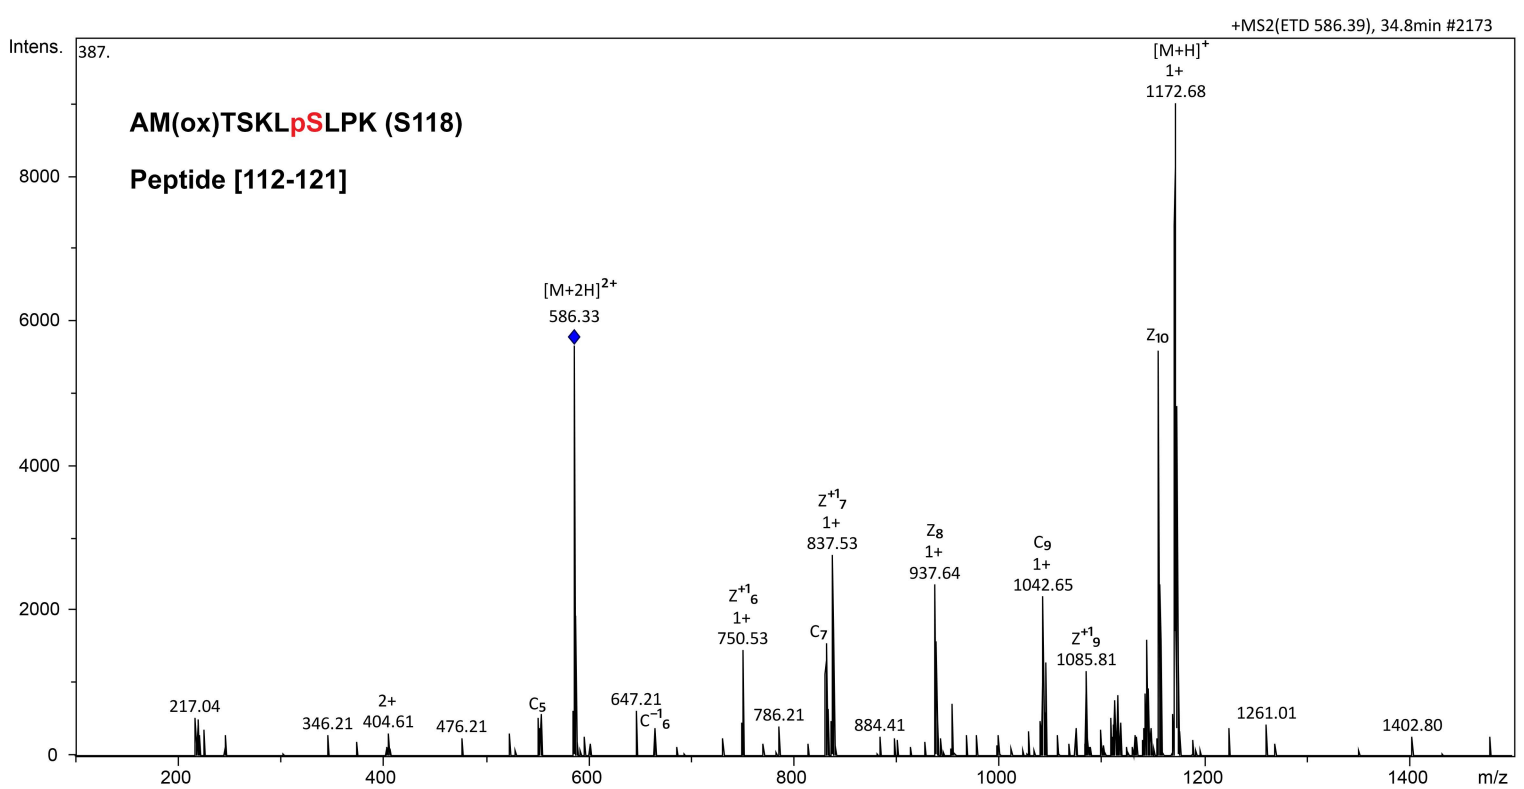

Supporting Figure S2

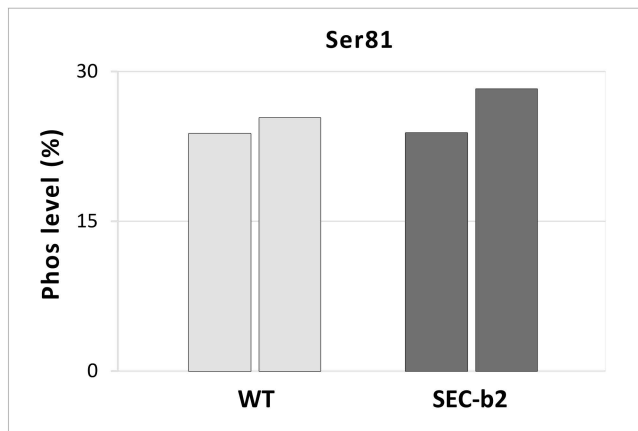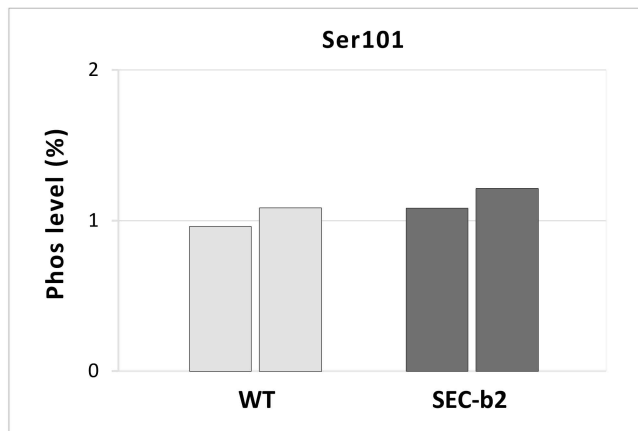

|                                                         | WT<br>(1)    | WT<br>(2)    | WT<br>average | SEC-b2<br>(1) | SEC-b2<br>(2) | SEC-b2<br>average |
|---------------------------------------------------------|--------------|--------------|---------------|---------------|---------------|-------------------|
| <b>Phos level at S81 (%)</b><br>[40-93] [60-93] [60-95] | <b>23.75</b> | <b>25.33</b> | 24.53         | <b>23.82</b>  | <b>28.24</b>  | 25.94             |
| <b>Phos level at S101 (%)</b><br>[94-109] [96-109]      | <b>0.96</b>  | <b>1.08</b>  | 1.02          | <b>1.08</b>   | <b>1.21</b>   | 1.14              |

# Supporting Figure S3

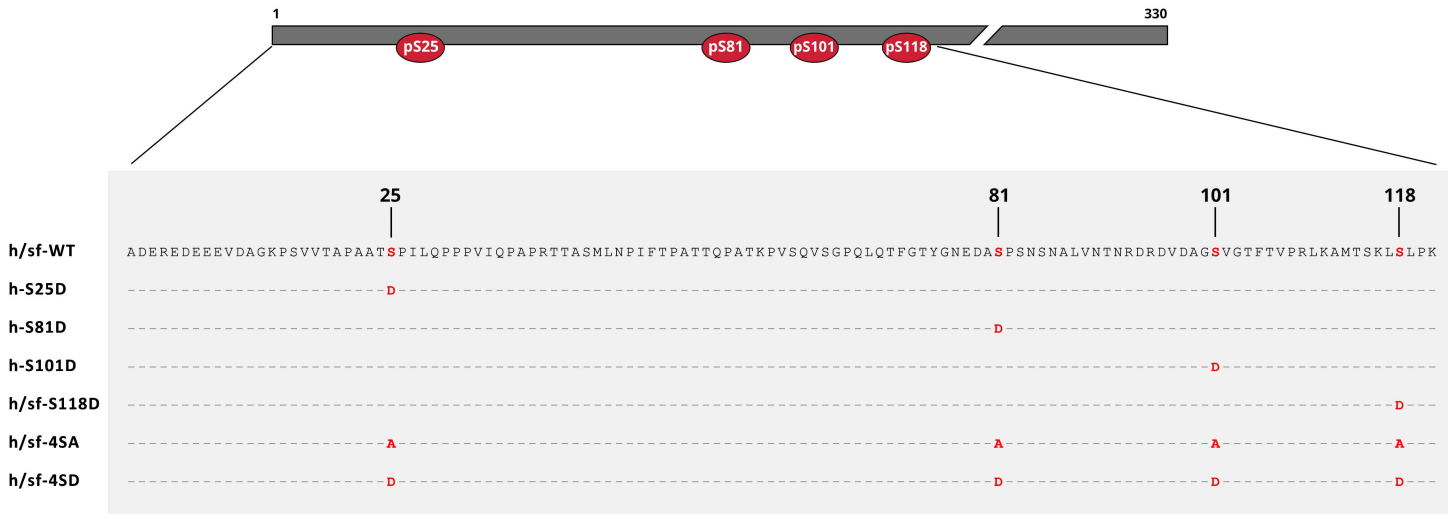

## Supporting Figure S4

*N. benthamiana*

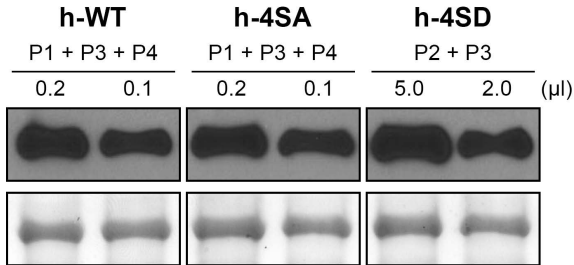

# Supporting Figure S5

**A**

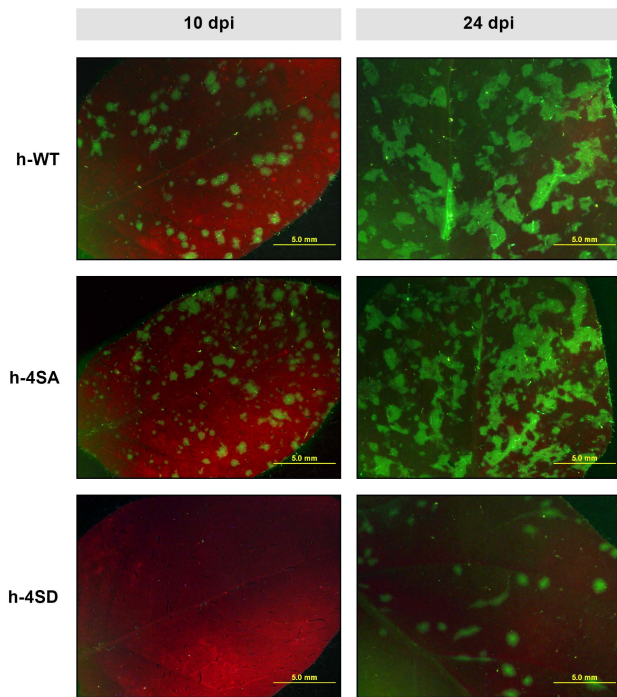

**B**

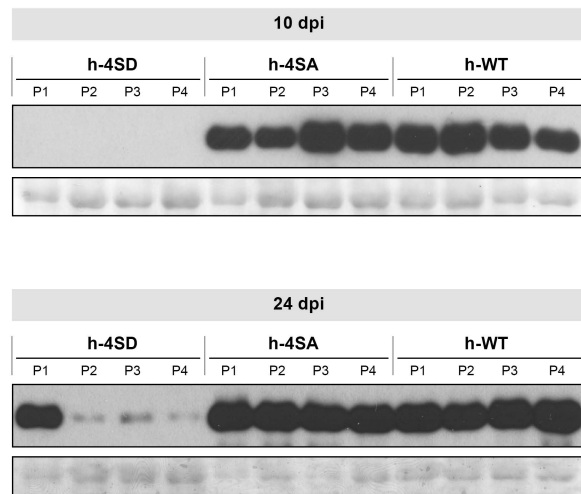

**C**

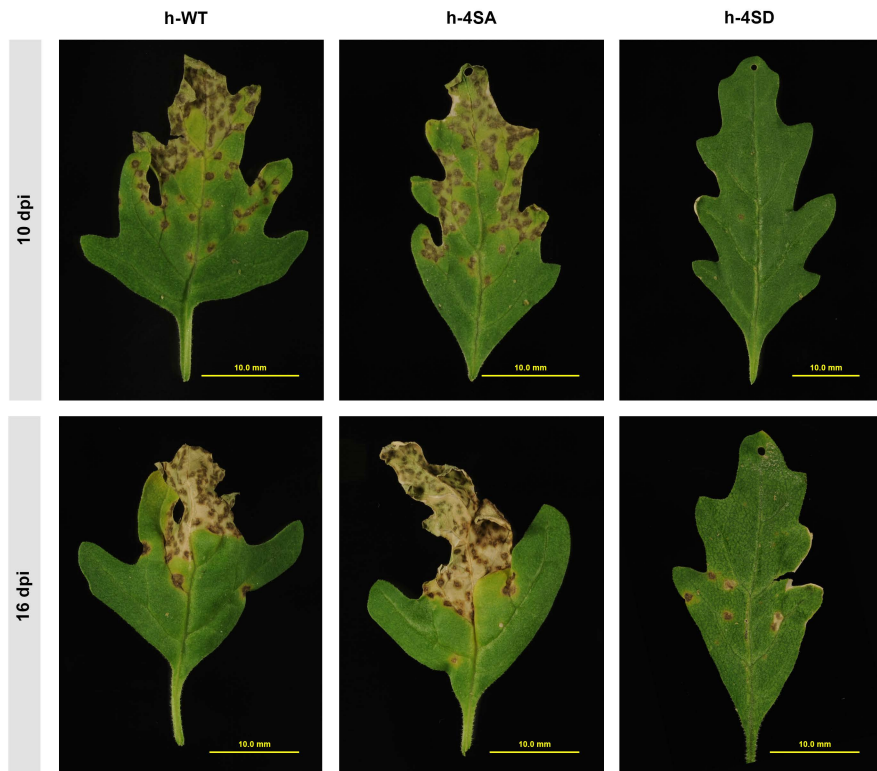

# Supporting Figure S6

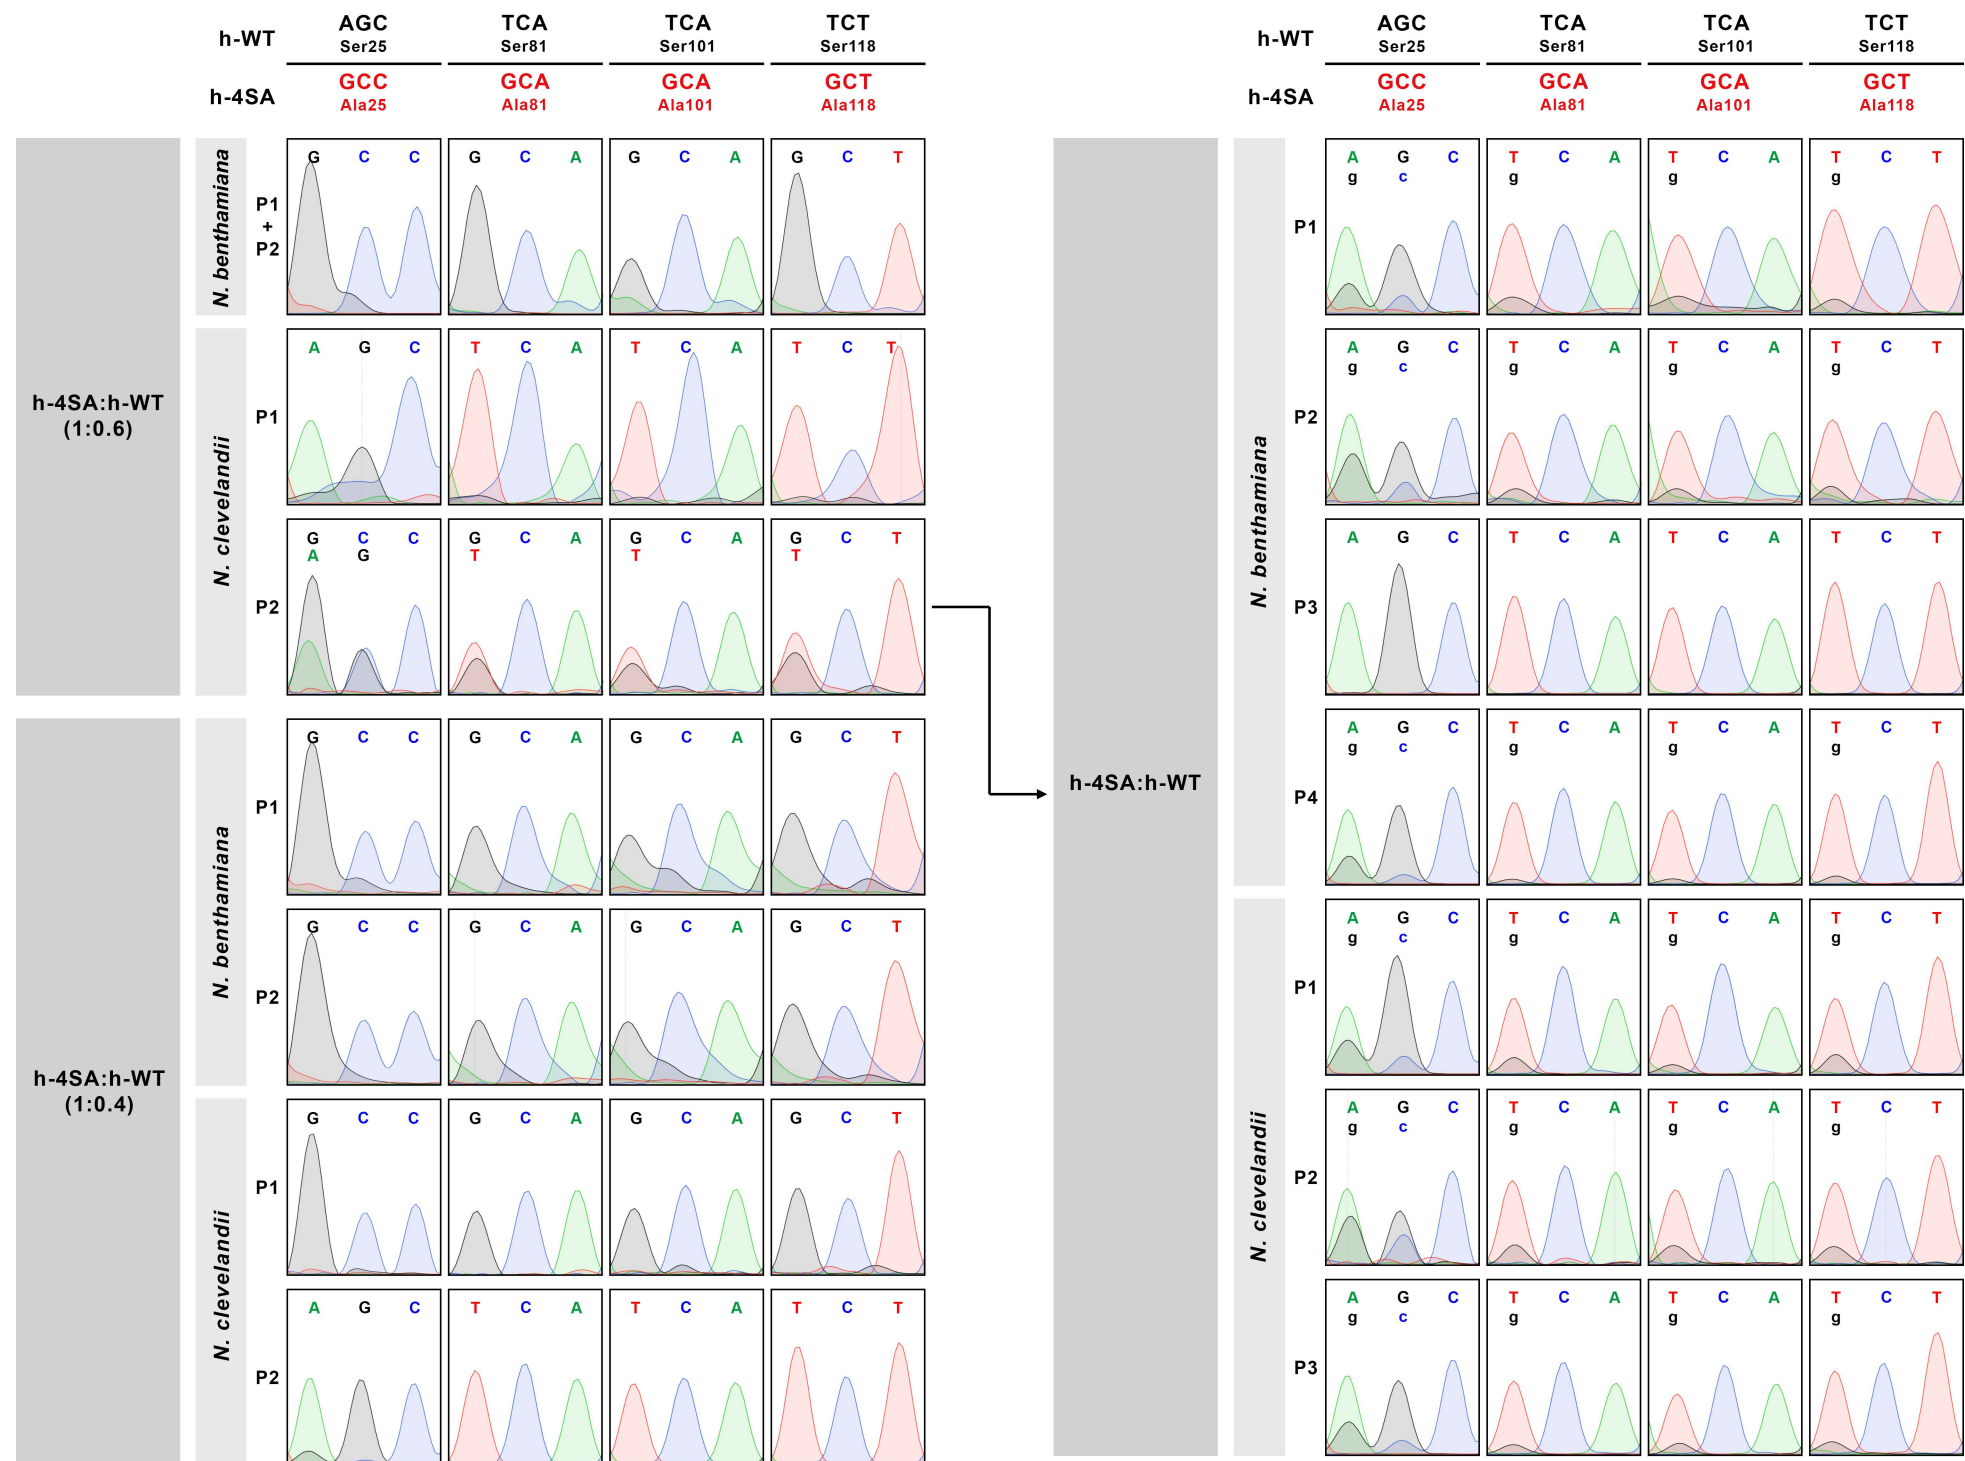

# Supporting Figure S7

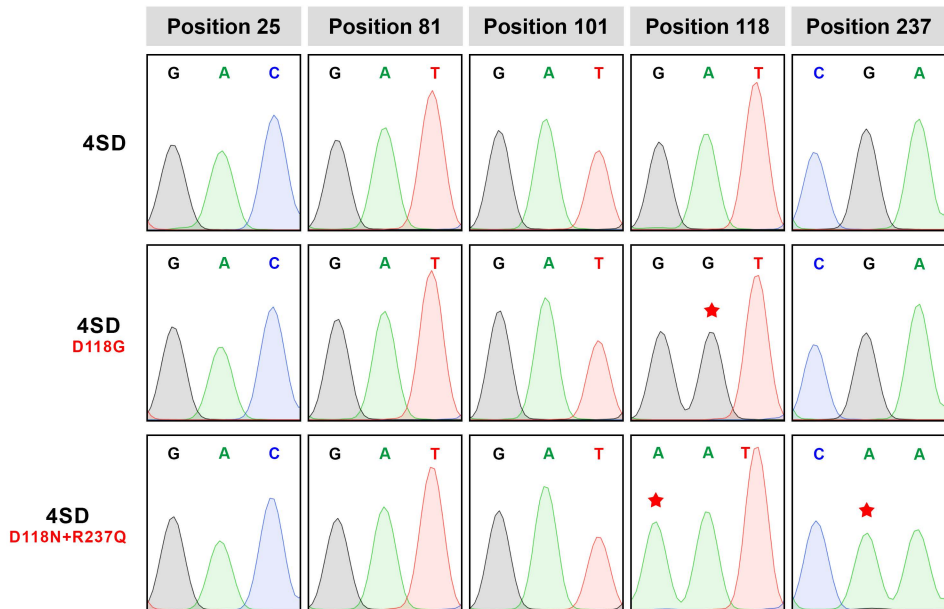

Supplement: NIHMS914925-supplement-Supp_FigS1-8.pdf [file NIHMS914925-supplement-Supp_FigS1-8.pdf]
